# Supplementary material for: The impact of the neisserial DNA uptake sequences on genome evolution and stability
Source: PubMed Central journal article supplement (PMC2397512; doi:10.1186/gb-2008-9-3-r60), 2008-03-26
Supplement: gb-2008-9-3-r60-s1.pdf [file gb-2008-9-3-r60-s1.pdf]

**Additional Table A1. Multiple alignment details.** Details of the multiple alignment of the six *Neisseria* genomes generated with M-GCAT. The global multiple alignment was divided into 79 M-GCAT Clusters (or locally co-linear regions) that are devoid of breakpoints such as rearrangements or large segments of lineage specific sequence. **Alignment Coverage** is the average percentage of each genome covered by the Clusters. **Polymorphic sites** are the number of variable sites in the alignment, and **Mono-morphic sites** represent the number of columns with conserved residues. **Conserved positions** indicates the total amount of columns with conserved residues in the multiple alignment, and **Conserved Blocks** designates the number of blocks of conserved positions occurring in at least four of the six genome sequences (as specified by Gblocks).

|                                   |                  |
|-----------------------------------|------------------|
| <b>Alignment Length</b>           | <b>2,224,085</b> |
| <b>Polymorphic sites</b>          | <b>192,618</b>   |
| <b>Mono-morphic sites</b>         | <b>1,394,876</b> |
| <b>Sites with &gt;0 Gaps</b>      | <b>636,591</b>   |
| <b>Conserved Blocks</b>           | <b>5,711</b>     |
| <b>Conserved Positions</b>        | <b>1,571,424</b> |
| <b>Alignment Coverage</b>         | <b>82.5%</b>     |
| <b>Clusters/Co-linear Regions</b> | <b>79</b>        |
| <b>Sites per Cluster</b>          | <b>28,153</b>    |
