# Supplementary material for: The impact of the neisserial DNA uptake sequences on genome evolution and stability
Source: PubMed Central journal article supplement (PMC2397512; doi:10.1186/gb-2008-9-3-r60), 2008-03-26
Supplement: gb-2008-9-3-r60-s2.pdf [file gb-2008-9-3-r60-s2.pdf]

**Additional Table A2-** Average nucleotide distance between DUS.  $\Delta$ DUS are all DUS elements.  $\Delta$  cDUS is the distance between composite DUS, which correspond to isolated DUS or to 2 inverted copies of a DUS in a transcription terminator. In this last case the distance between the two inverted copies is not counted as the two copies are regarded as one single composite element.

|                       | $\Delta$ DUS | $\Delta$ cDUS |
|-----------------------|--------------|---------------|
| <i>N. men.</i> Z2491  | 1154         | 1469          |
| <i>N. men.</i> MC58   | 1174         | 1511          |
| <i>N. men.</i> FAM18  | 1162         | 1506          |
| <i>N. men.</i> 8013   | 1189         | 1525          |
| <i>N. gonorrhoeae</i> | 1096         | 1372          |
| <i>N. lactamica</i>   | 995          | 1280          |
