# Supplementary material for: The impact of the neisserial DNA uptake sequences on genome evolution and stability
Source: PubMed Central journal article supplement (PMC2397512; doi:10.1186/gb-2008-9-3-r60), 2008-03-26
Supplement: gb-2008-9-3-r60-s3.pdf [file gb-2008-9-3-r60-s3.pdf]

**Additional Table A3-** Under-representation of DUS in strain specific insertions. We detected a total of 519 strain specific insertions of length >100nt in the M-GCAT alignment. We searched for DUS inside of these insertions and found significantly less DUS than expected ( $\chi^2$ ,  $p < 0.00024$ ). **# of insertions** indicates the # of insertions >100nt specific only to one strain that were found. **Avg. length** is the mean length of all the insertions specific to a given strain, and **# DUS is** the total number of DUS found inside of all of the strain specific insertions in each genome.

|                       | # of strain specific insertions | Avg. length | # DUS |
|-----------------------|---------------------------------|-------------|-------|
| <i>N. men.</i> Z2491  | 43                              | 434         | 1     |
| <i>N. men.</i> MC58   | 40                              | 365         | 2     |
| <i>N. men.</i> FAM18  | 63                              | 429         | 3     |
| <i>N. men.</i> 8013   | 47                              | 396         | 4     |
| <i>N. gonorrhoeae</i> | 102                             | 370         | 12    |
| <i>N. lactamica</i>   | 224                             | 621         | 94    |
