# Supplementary material for: The impact of the neisserial DNA uptake sequences on genome evolution and stability
Source: PubMed Central journal article supplement (PMC2397512; doi:10.1186/gb-2008-9-3-r60), 2008-03-26
Supplement: gb-2008-9-3-r60-s4.pdf [file gb-2008-9-3-r60-s4.pdf]

**Additional Table A4-** Classification of polymorphic sites. We classified all of the single nucleotide differences for the 192,618 polymorphic sites contained in the multiple alignment. Approximately 95% of the polymorphic sites contained only two alleles, and the remaining 5% of polymorphic sites contained three or four alleles. There were a total of 31 different patterns for sites with two alleles, and the 12 most frequent bi-allelic patterns are shown. Pattern labels are as follows: A = *N. meningitidis* Z2491 serogroup A, B= *N. meningitidis* MC58, serogroup B, C= *N. meningitidis* FAM18 serogroup C, D= *N. meningitidis* 8013 serogroup C, G= *N. gonorrhoeae* FA1090, L= *N. lactamica* ST-640.

| Rank | Pattern<br>ABCDGL | Inferred Topology | Freq. | %    |
|------|-------------------|-------------------|-------|------|
| 1    | 111112            | ((ABCDG) L)       | 59810 | 31.1 |
| 2    | 111121            | ((ABCDL) G)       | 30698 | 15.9 |
| 3    | 111122            | ((ABCD)(GL))      | 16397 | 8.5  |
| 4    | 121111            | ((ACDGL) B)       | 8012  | 4.2  |
| 5    | 211111            | ((BCDGL) A)       | 7561  | 3.9  |
| 6    | 112111            | ((ABDGL) C)       | 6756  | 3.5  |
| 7    | 111211            | ((ABCGL) D)       | 6317  | 3.3  |
| 8    | 121122            | ((ACD)(BGL))      | 3025  | 1.6  |
| 9    | 121112            | ((ACDG)(BL))      | 2951  | 1.5  |
| 10   | 112211            | ((ABGL)(CD))      | 2719  | 1.4  |
| 11   | 211112            | ((BCDG)(AL))      | 2674  | 1.4  |
| 12   | 111212            | ((ABCG)(DL))      | 2575  | 1.3  |
