# Supplementary material for: The impact of the neisserial DNA uptake sequences on genome evolution and stability
Source: PubMed Central journal article supplement (PMC2397512; doi:10.1186/gb-2008-9-3-r60), 2008-03-26
Supplement: gb-2008-9-3-r60-s5.pdf [file gb-2008-9-3-r60-s5.pdf]

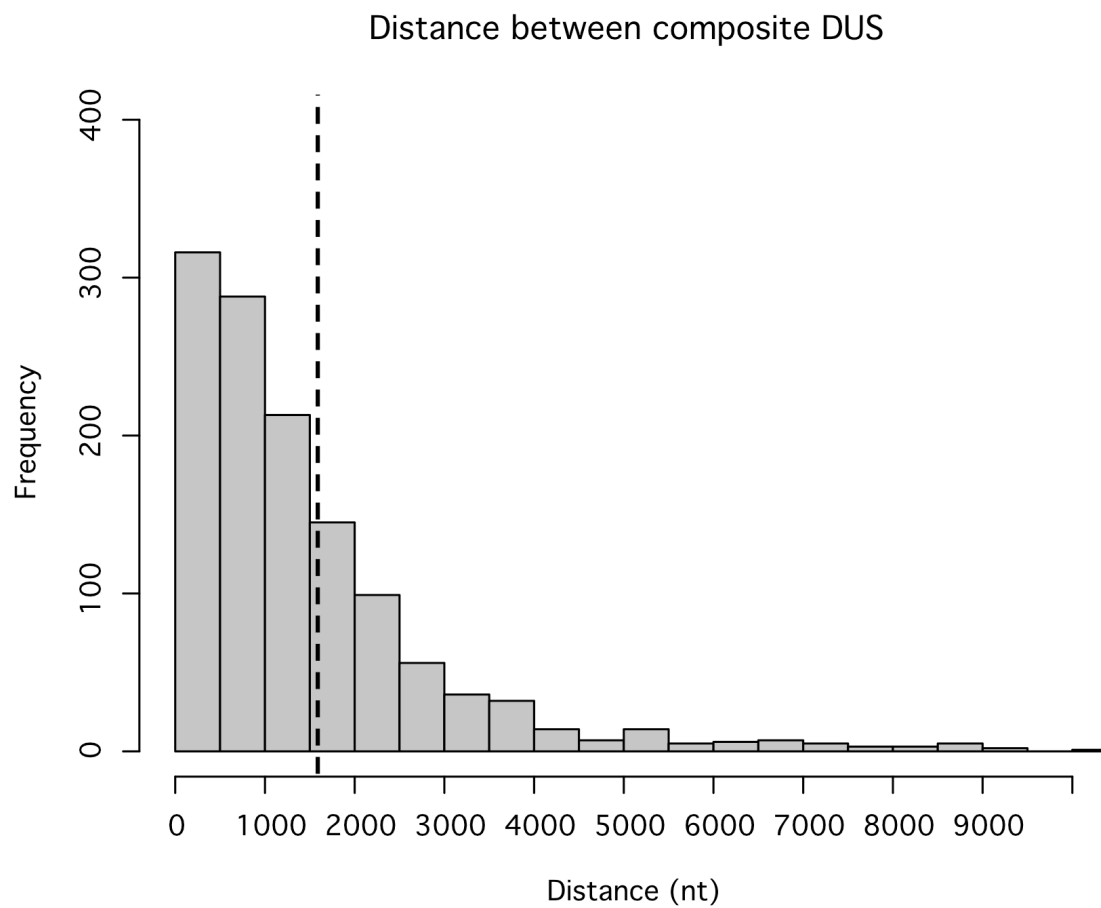

**Additional Figure A1** – Distribution of the distance between contiguous composite DUS in the *Neisseria meningitidis* Z2491 genome.
