# Supplementary material for: The impact of the neisserial DNA uptake sequences on genome evolution and stability
Source: PubMed Central journal article supplement (PMC2397512; doi:10.1186/gb-2008-9-3-r60), 2008-03-26
Supplement: gb-2008-9-3-r60-s6.pdf [file gb-2008-9-3-r60-s6.pdf]

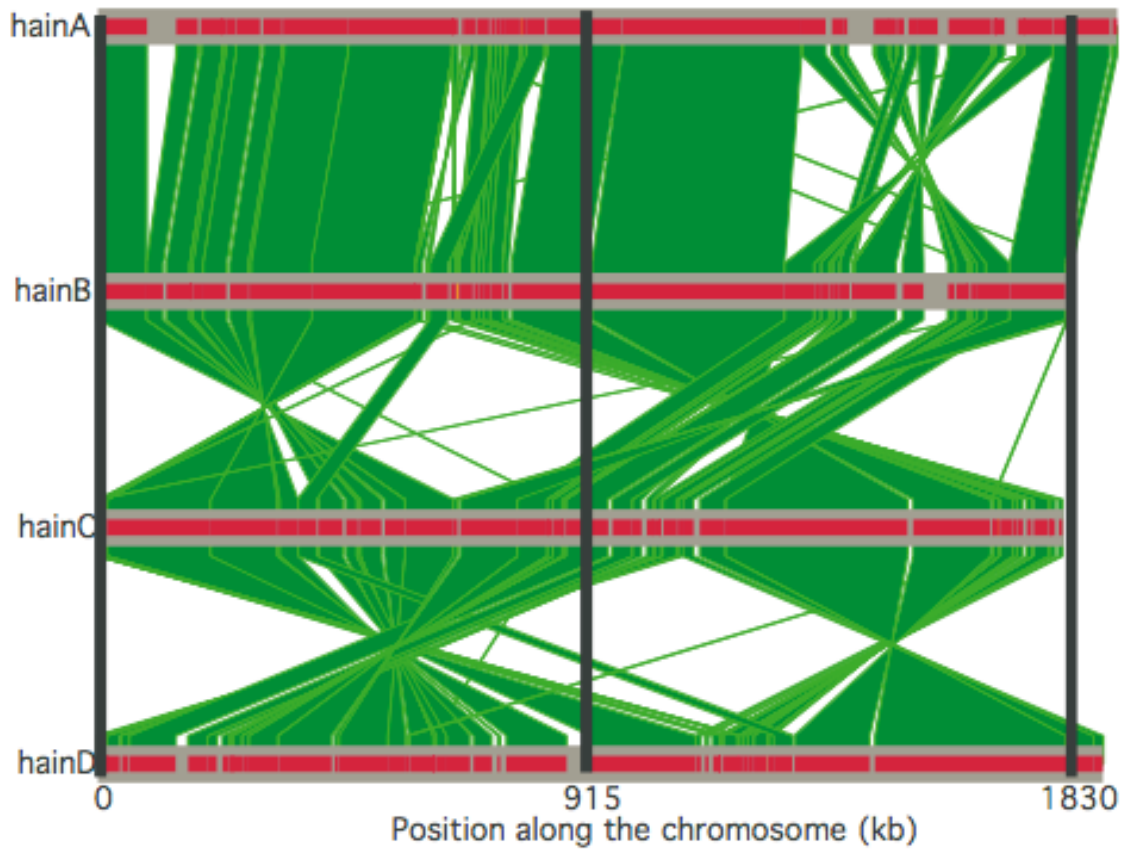

**Additional Figure A2 – Visual representation of M-GCAT’s multiple alignment of four *Haemophilus influenzae* genomes. hainA:** *H. influenzae* strain 86-028NP (CP000057.1); **hainB:** *H. influenzae* Rd KW20 (L42023.1); **hainC:** *H. influenzae* PittEE (CP000671.1); **hainD:** *H. influenzae* PittGG (CP000672.1). There were 53 M-GCAT Clusters of average length 32,060 nt. In total, 91.3% of the original genome sequences are covered by the multiple alignment, and 8.7% was left unaligned.
